# Supplementary material
Source: PubMed Central journal article supplement (PMC9487606)
Supplement: aac.00592-22-s0001.pdf [file aac.00592-22-s0001.pdf]

1 **Supplementary File**

2  
3 **Moxifloxacin-mediated killing of *Mycobacterium***  
4 ***tuberculosis* involves respiratory downshift, reductive stress, and**  
5 **ROS accumulation**  
6

7 Somnath Shee<sup>1, 2</sup> ¶, Samsheer Singh<sup>1, 2</sup> ¶, Ashutosh Tripathi<sup>1, 2</sup>, Chandrani Thakur<sup>3</sup>,  
8 Anand Kumar T<sup>4</sup>, Mayashree Das<sup>1, 2</sup>, Vikas Yadav<sup>1, 2</sup>, Sakshi Kohli<sup>1, 2</sup>, Raju S.  
9 Rajmani<sup>2</sup>, Nagasuma Chandra<sup>3</sup>, Harinath Chakrapani<sup>4</sup>, Karl Drlica<sup>5</sup> \*, Amit Singh<sup>1, 2</sup> \*

10  
11 <sup>1</sup>Department of Microbiology and Cell Biology, <sup>2</sup>Centre for Infectious Disease  
12 Research, Indian Institute of Science, Bangalore 560012, Karnataka, India

13 <sup>3</sup>Department of Biochemistry, Indian Institute of Science, Bangalore 560012,  
14 Karnataka, India

15 <sup>4</sup>Department of Chemistry, Indian Institute of Science Education and Research (IISER)  
16 Pune, Pune 411 008, Maharashtra, India

17 <sup>5</sup>Public Health Research Institute and Department of Microbiology, Biochemistry &  
18 Molecular Genetics, New Jersey Medical School, Rutgers Biomedical and Health  
19 Sciences, Rutgers University, Newark, NJ 07103

20 *Running title:* Redox-mechanisms of moxifloxacin lethality in *M. tb*

21 ¶ Equal Contribution

25

## Contents

### 26 Supplementary Tables

27 **Table S1.** Susceptibility of *M. tuberculosis* to fluoroquinolones under *in vitro*  
28 aerobic growth conditions.

29 **Table S2.** Lethality of fluoroquinolones with *M. tuberculosis* under dormancy-  
30 inducing conditions.

31 **Table S3.** Functional categorization of genes deregulated in *M. tuberculosis* by  
32 moxifloxacin.

33 **Table S4.** Summary of overlap between moxifloxacin exposure (number of  
34 differentially expressed genes = 359) and various stress conditions.

35 **Table S5.** Susceptibility of *M. tuberculosis* strains to diverse anti-TB drugs under  
36 *in vitro* aerobic growth conditions.

37 **Table S6.** Mutant prevention concentration (MPC) of moxifloxacin with NAC  
38 against MDR *M. tuberculosis* strain NHN1664.

39

### 40 Supplementary Figures

41 **Fig. S1.** Mrx1-roGFP2 measures redox changes in *M. tuberculosis* in response to  
42 H<sub>2</sub>O<sub>2</sub>.

43 **Fig. S2.** Effect of moxifloxacin and NAC on redox biosensor oxidation in *M.*  
44 *tuberculosis* cultures.

45 **Fig. S3.** Moxifloxacin treatment increases markers of oxidative stress (DNA  
46 double strand breaks and lipid hydroperoxides) in *M. tuberculosis*.

47 **Fig. S4.** Effect of various fluoroquinolones on ROS production in *M. tuberculosis*.

48 **Fig. S5.** Increased free Fe concentration leads to ROS generation in *M.*  
49 *tuberculosis*.

50 **Fig. S6.** Moxifloxacin treatment increases free Fe pools and DNA breaks in *M.*  
51 *tuberculosis* that are decreased by NADH dissipation.

52 **Fig. S7.** Reduction in moxifloxacin lethal activity by the ROS scavenger thiourea.

53 **Fig. S8.** Addition of extra bovine serum albumin to agar plates does not protect  
54 *M. tuberculosis* from moxifloxacin-mediated lethality.

55 **Fig. S9.** Moxifloxacin lethality during nutrient starvation and hypoxia.

56 **Fig. S10.** Determination of lethal dose (LD<sub>90</sub>) of moxifloxacin with aerobically  
57 cultured *M. tuberculosis*.

58 **Fig. S11.** Heat map showing qRT-PCR validation of 28 randomly selected genes  
59 differentially regulated in the microarray data.

60 **Fig. S12.** Heat-map showing differential gene overlap between moxifloxacin-  
61 exposed *M. tuberculosis* and various stress conditions.

62 **Fig. S13.** Decelerated respiration in *M. tuberculosis* upon moxifloxacin treatment  
63 is not due to bacterial death.

64 **Fig. S14.** Low moxifloxacin concentrations decelerate respiration rate in *M.*  
65 *tuberculosis*.

66 **Fig. S15.** Ethambutol treatment does not affect respiration rate in *M. tuberculosis*.

67 **Fig. S16.** Moxifloxacin treatment decreases total NAD/H (NADH+NAD<sup>+</sup>) in *M.*  
68 *tuberculosis*.

69 **Fig. S17.** Moxifloxacin treatment increases NADH/NAD<sup>+</sup> ratios in *M. tuberculosis*  
70 detected by Peredox.

71 **Fig. S18.** NADP<sup>+</sup> and NADPH levels in moxifloxacin-treated *M. tuberculosis*.

72 **Fig. S19.** Total NAD/H (NADH+NAD<sup>+</sup>) was not affected by overexpression of  
73 *LbNox* in *M. tuberculosis*.

74 **Fig. S20.** Constitutive expression of *LbNox* does not impair metabolism and  
75 growth of rate of *M. tuberculosis*.

76 **Fig. S21.** NAC has no effect on moxifloxacin MIC with *M. tuberculosis*.

77 **Fig. S22.** Addition of NAC after removal of moxifloxacin increases killing of *M.*  
78 *tuberculosis*.

79 **Fig. S23.** Several tests argue against formation of adducts between NAC and  
80 moxifloxacin (MOXI).  
81

82 **Fig. S24.** Moxifloxacin-induced oxidative shift in  $E_{MSH}$  of *M. tuberculosis*  
83 NHN1664 during infection of THP-1 cells.

84 **Fig. S25.** Intramacrophage *E<sub>MSH</sub>*-reduced *M. tuberculosis* shows reduced killing  
85 by moxifloxacin.

86

87 **Dataset S1.** List of deregulated genes in *M. tuberculosis* after treatment with 2X, 4X  
88 and 8X MIC of moxifloxacin (1X MIC = 0.4 µM) for 16 h.

89

90 **Supplementary References**

91

92

93 **Supplementary Tables**

94

95 **Table S1. Susceptibility of *M. tuberculosis* to fluoroquinolones under *in vitro***  
96 **aerobic growth conditions**

| Strain              | Susceptibility characteristic  | MIC in $\mu\text{M}$ ( $\mu\text{g/mL}$ ) |                  |                  |
|---------------------|--------------------------------|-------------------------------------------|------------------|------------------|
|                     |                                | MOXI <sup>1</sup>                         | LEV <sup>1</sup> | CIP <sup>1</sup> |
| H37Rv               | Susceptible                    | 0.5 (0.21)                                | 1(0.36)          | 2 (0.66)         |
| <i>Mtb-roGFP2</i>   | Susceptible                    | 0.5 (0.21)                                | ND               | ND               |
| BND-320             | INH <sup>1</sup> monoresistant | 0.5 (0.21)                                | 1 (0.36)         | 2 (0.66)         |
| JAL-2287            | MDR <sup>1</sup>               | 0.25 (0.1)                                | 1 (0.36)         | 2 (0.66)         |
| JAL-1934            | MDR <sup>1</sup>               | 0.5 (0.21)                                | 1 (0.36)         | 4 (1.3)          |
| JAL-2261            | MDR <sup>1</sup>               | 0.5 (0.21)                                | 1 (0.36)         | 4 (1.3)          |
| NHN1664             | MDR <sup>1</sup>               | 0.125 (0.05)                              | ND               | ND               |
| H37Rv- <i>LbNox</i> | Susceptible                    | 0.5 (0.21)                                | ND               | ND               |
| Moxi <sup>R</sup>   | Resistant to MOXI              | 1.25 (0.53)                               | ND               | ND               |

97 <sup>1</sup>Abbreviations: MOXI, moxifloxacin; LEV, levofloxacin; CIP, ciprofloxacin; INH, isoniazid; MDR,  
98 multidrug resistant; ND: not determined.

99

100 **Table S2. Lethality of fluoroquinolones (FQ) with *M. tuberculosis* in dormancy-**  
101 **inducing conditions**

| FQ                             | MIC <sup>1</sup> | MBC <sup>2</sup> | LCC <sub>90</sub> <sup>3</sup> | WCC <sub>90</sub> <sup>4</sup> |
|--------------------------------|------------------|------------------|--------------------------------|--------------------------------|
|                                |                  |                  | (Starvation)                   | (Hypoxia)                      |
| Concentration in $\mu\text{M}$ |                  |                  |                                |                                |
| <b>Ciprofloxacin</b>           | 2                | 2                | >32                            | ND <sup>5</sup>                |
| <b>Levofloxacin</b>            | 1                | 1                | >32                            | ND                             |
| <b>Moxifloxacin</b>            | 0.5              | 0.5              | >32                            | 10                             |

102

103 <sup>1</sup>MIC was determined as 90% prevention of resazurin color change compared to untreated control.104 <sup>2</sup>MBC was defined as concentration  $\geq$ MIC which prevents colonies from appearing when 1/10 volume  
105 from MIC plate is regrown on 7H11 agar.106 <sup>3</sup>Loebel cidal concentration (LCC<sub>90</sub>): 90% reduction in viable bacilli under nutrient starvation (1).107 <sup>4</sup>Wayne cidal concentration (WCC<sub>90</sub>): 90% decrease in viable bacilli under hypoxia (1).108 <sup>5</sup>ND: not determined.

109

110

111 **Table S3. Functional categorization of genes deregulated in *M. tuberculosis* by**  
 112 **moxifloxacin.**  
 113

| Functional category                     | % genes in each category |               |
|-----------------------------------------|--------------------------|---------------|
|                                         | Genome                   | Transcriptome |
| Cell wall and cell processes            | 19.1                     | 15.9          |
| Conserved hypotheticals                 | 25.8                     | 30.4          |
| Information pathways                    | 6.02                     | 12.9          |
| Intermediary metabolism and respiration | 23.2                     | 16.2          |
| Lipid metabolism                        | 6.74                     | 6.68          |
| PE/PPE                                  | 4.16                     | 1.95          |
| Regulatory proteins                     | 4.91                     | 3.89          |
| Unknown                                 | 0.37                     | 0.27          |
| Virulence, detoxification, adaptation   | 5.95                     | 5.29          |
| Insertion sequences and phages          | 3.64                     | 6.26          |

114  
 115  
 116  
 117  
 118  
 119  
 120  
 121  
 122  
 123  
 124  
 125  
 126

127 **Table S4: Summary of overlap between moxifloxacin exposure (number of**  
 128 **differentially expressed genes = 359) and various stress conditions.**

129

| Stress condition                                  | No. of differentially expressed genes in the stress condition <sup>2</sup> | Intersection with Moxifloxacin condition | p-value of gene-set overlap | Odds Ratio | Reference |
|---------------------------------------------------|----------------------------------------------------------------------------|------------------------------------------|-----------------------------|------------|-----------|
| Acidic pH5.5                                      | 212                                                                        | 17                                       | 0.72                        | 0.88       | (2)       |
| Hypoxia DosR                                      | 46                                                                         | 0                                        | 1                           | 0          | (3)       |
| H <sub>2</sub> O <sub>2</sub> stress <sup>1</sup> | 213                                                                        | 55                                       | 5.39 e-14                   | 4.01       | (4)       |
| Nitric Oxide stress <sup>1</sup>                  | 237                                                                        | 48                                       | 2.13 e-08                   | 2.83       | (4)       |

130 <sup>1</sup>Considered significant at  $p < 0.05$  and odds ratio  $> 1$ . Significantly overlapped pairs are highlighted in  
 131 grey.

132 <sup>2</sup> $\log_2$  fold change  $> 1$  or  $< -1$  and  $p$  value  $< 0.01$  is considered differentially expressed genes in stress  
 133 conditions.

134

135

136 **Table S5. Susceptibility of *M. tuberculosis* strains to diverse anti-TB drugs**  
 137 **under *in vitro* aerobic growth conditions.**

| Anti-TB drugs | MIC <sub>90</sub> (µg/ml) <sup>1</sup> |                    |
|---------------|----------------------------------------|--------------------|
|               | <i>H37Rv</i>                           | <i>H37Rv-LbNox</i> |
| Isoniazid     | 0.06                                   | 0.03               |
| Rifampicin    | 0.008                                  | 0.008-0.016        |
| Ethambutol    | 2.5-5                                  | 5                  |
| Bedaquiline   | 0.5                                    | 0.25-0.5           |

138

139 <sup>1</sup>Data shown are the result of two independent experiments performed in quadruplicate.

140

141

142

143

144 **Table S6. Mutant prevention concentration (MPC) of moxifloxacin with NAC**  
 145 **against MDR *M. tuberculosis* strain NHN1664.**  
 146

| Moxifloxacin concentration<br>μM (fold MIC <sup>a</sup> ) | NAC Concentration (mM) | Number of Resistant colonies on drug containing 7H11 <sup>b</sup> |     |    |     | Mutation Frequency with moxifloxacin          |
|-----------------------------------------------------------|------------------------|-------------------------------------------------------------------|-----|----|-----|-----------------------------------------------|
|                                                           |                        |                                                                   |     |    |     |                                               |
| 1 (2X)                                                    | 0                      | 406                                                               | 405 |    |     | 1.6×10 <sup>-7</sup>                          |
|                                                           | 1                      | 45                                                                | 55  | 70 | 124 | 3.0×10 <sup>-8</sup>                          |
|                                                           | 2                      | 16                                                                | 7   | 4  | 1   | 2.8×10 <sup>-9</sup>                          |
| 2 (4X)                                                    | 0                      | 4                                                                 | 6   | 17 | 39  | 6.7×10 <sup>-9</sup>                          |
|                                                           | 1                      | 0                                                                 | 0   | 0  | 5   | <4.0×10 <sup>-10</sup> - 2.0×10 <sup>-9</sup> |
|                                                           | 2                      | 0                                                                 |     |    |     | <4.0×10 <sup>-10</sup>                        |
| 4 (8X <sup>c</sup> )                                      | 0                      | 0                                                                 |     |    |     | <4.0×10 <sup>-10</sup>                        |
|                                                           | 1                      | 0                                                                 |     |    |     | <4.0×10 <sup>-10</sup>                        |
|                                                           | 2                      | 0                                                                 |     |    |     | <4.0×10 <sup>-10</sup>                        |

147

148 <sup>a</sup>fold MIC with respect to MIC of H37Rv (0.5 μM)

149 <sup>b</sup>Number of input bacteria = 2.5×10<sup>9</sup> per plate. Data are from two independent experiments  
 150 performed in duplicate.

151 <sup>c</sup>MPC for drug alone.

152

153

154

155

156

157

158

159

160

161

162

163

164

165

166

167

168

169

170



171 **Supplementary Figures**

172

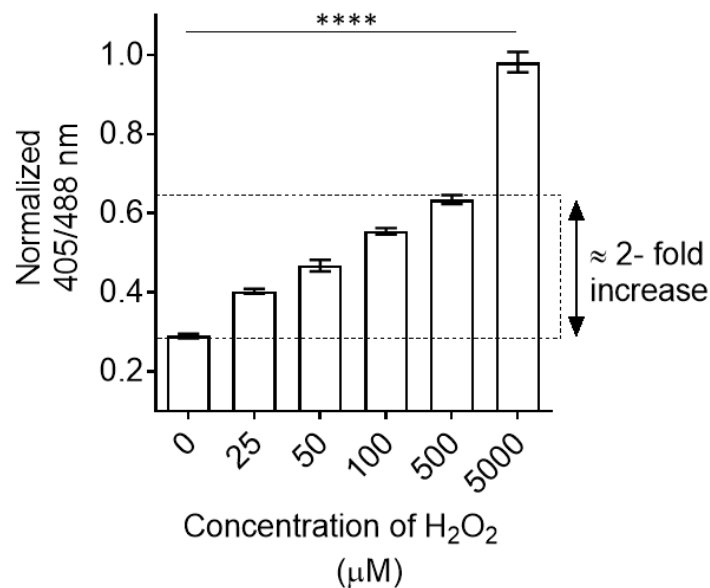

173

174 **Fig. S1. Mrx1-roGFP2 measures redox changes in *M. tuberculosis* in response**  
175 **to H<sub>2</sub>O<sub>2</sub>.** *M. tuberculosis* expressing Mrx1-roGFP2 was treated with the indicated  
176 concentrations of H<sub>2</sub>O<sub>2</sub> for 5 min, and the ratiometric sensor response was measured  
177 by flow cytometry. A 2-fold increase in biosensor's ratiometric signal inside cells  
178 corresponds to biosensor oxidation in cells treated with 500 µM of H<sub>2</sub>O<sub>2</sub> when  
179 compared to untreated cells. Error bars represent standard deviation from the mean.  
180 Data represent at least two independent experiments performed in at least duplicate.  
181 Statistical significance was analyzed over untreated control by one-way ANOVA  
182 analysis (\*\*\*\**p* < 0.0001).

183 Since H<sub>2</sub>O<sub>2</sub> alone (0.5–5 mM) does not directly oxidize the Mrx1-roGFP2 (5), the data  
184 suggest that H<sub>2</sub>O<sub>2</sub>-mediated oxidation of MSH to MSSM occurs via an intermediary  
185 enzyme (mycothiol peroxidase or peroxiredoxins), resulting in biosensor oxidation.  
186 These results, along with previous findings with Mrx1-roGFP2, show a direct  
187 relationship between changes in biosensor ratio and mycobacterial redox physiology  
188 (5-8).

189

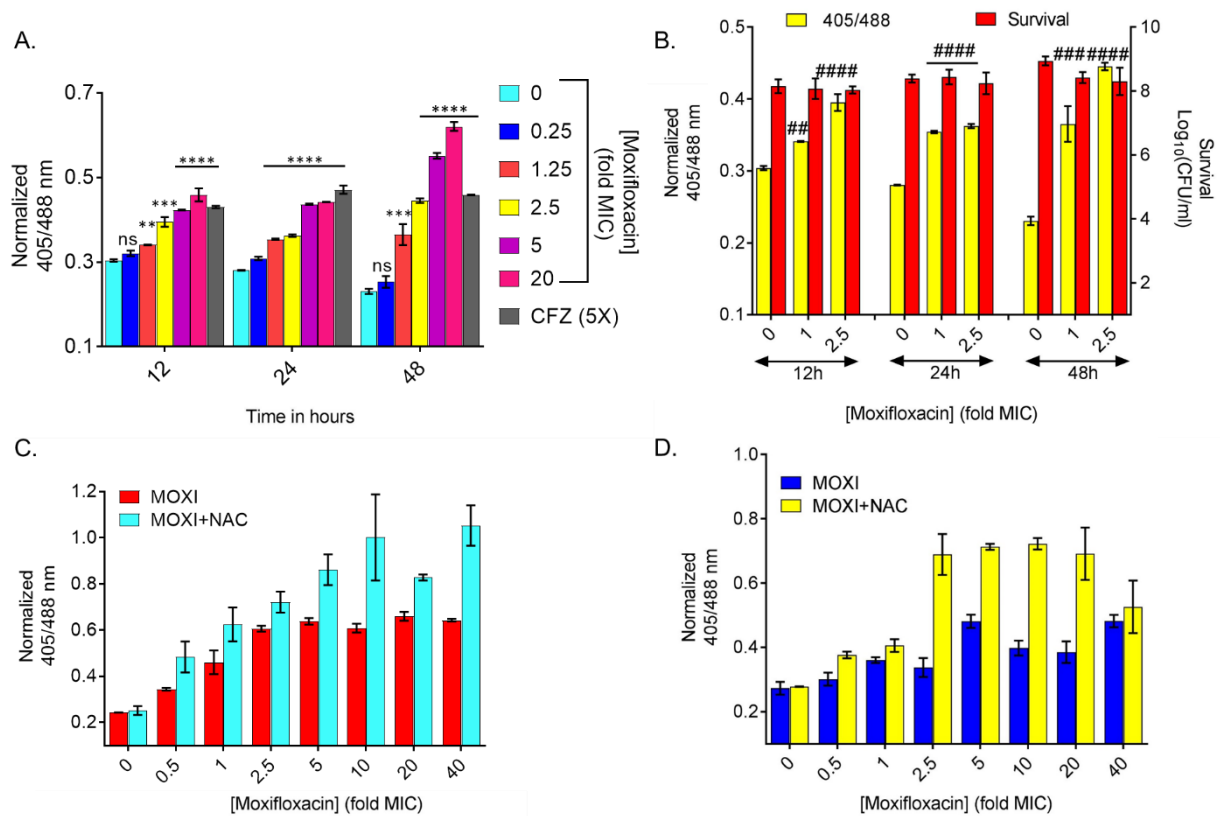

190

191 **Fig. S2. Effect of moxifloxacin and NAC on redox biosensor oxidation in *M.***

192 ***tuberculosis* cultures. (A)** Effect of moxifloxacin on redox biosensor. Log-phase *M.*

193 *tuberculosis*-roGFP2 cultures were treated with the indicated concentrations of

194 moxifloxacin (MOXI; 1X MIC= 0.5  $\mu$ m), and the ratiometric response of the biosensor

195 was determined at the indicated times. Moxifloxacin at sub-inhibitory concentrations

196 did not induce oxidative stress. Clofazimine (CFZ at 5X MIC = 2.5  $\mu$ g/mL) served as a

197 positive control. **(B)** Time-resolved kinetics of ROS production and survival of *M.*

198 *tuberculosis* during an early phase of moxifloxacin treatment. Difference in survival

199 (red bars) is not significant at 12 h and 24 h. **(C)** Effect of NAC on biosensor signal. *M.*

200 *tuberculosis*-roGFP2 was grown to OD<sub>600</sub> = 0.2-0.3, pretreated with 1 mM NAC for 1

201 h, and then treated with the indicated concentrations of moxifloxacin for 48 h. **(D)** Effect

202 of NAC on *M. tuberculosis* NHN1664 expressing the biosensor. Conditions were as in

203 panel C.

204

205 Data in this figure show that moxifloxacin treatment oxidizes, and increases, the redox

206 biosensor signal and that NAC further increases the biosensor signal. The NAC-only

207 control is shown as zero moxifloxacin. Data represent two independent experiments

208 performed in duplicate. Error bars represent standard deviation from the mean. *p* was

209 determined by unpaired two-tailed student's t-test analyzed relative to an untreated

210 control. (\* *p* < 0.05, \*\* *p*  $\leq$  0.01 and \*\*\* *p*  $\leq$  0.001 relative to the untreated control; ns

211 indicates not significant). (## *p*  $\leq$  0.01, ### *p*  $\leq$  0.001 and ##### *p* < 0.0001; comparison

212 of normalized 405/488 of treated *M. tuberculosis* with respect to untreated control at

213 respective time- points in Fig. S2B).

214

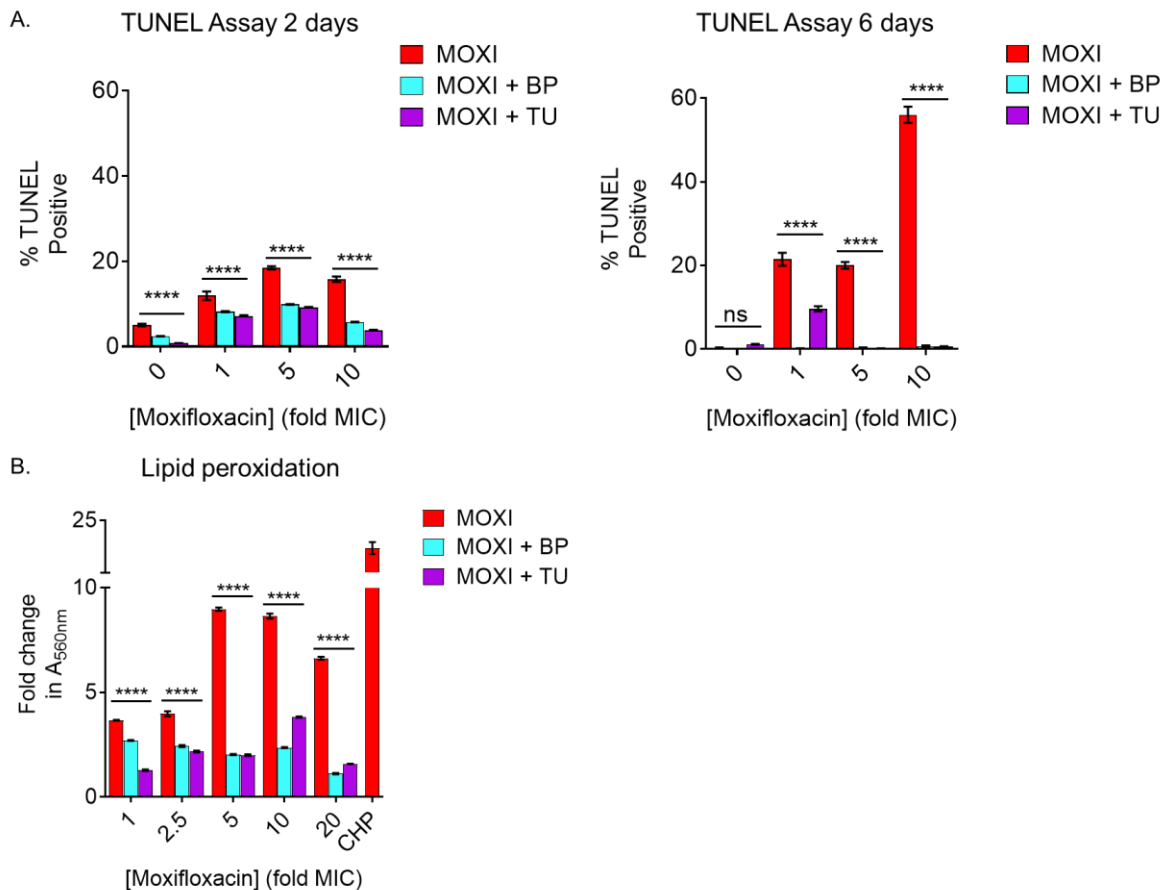

215  
 216 **Fig. S3. Moxifloxacin treatment increases markers of oxidative stress (DNA**  
 217 **double-strand breaks and lipid hydroperoxides) in *M. tuberculosis*.** Exponentially  
 218 growing *M. tuberculosis* cultures were either left untreated or treated with 250  $\mu$ M  
 219 bipyridyl (BP) for 15 min or with 10 mM thiourea (TU) for 1 h prior to addition of the  
 220 indicated concentrations of moxifloxacin (MOXI) (1X MIC= 0.5  $\mu$ M) for either 2 days or  
 221 6 days. **(A)** TUNEL Assay for measuring DNA double-stranded breaks using flow  
 222 cytometry. **(B)** Lipid hydroperoxides were isolated after 2 days of MOXI treatment and  
 223 measured after incubating with FOX2 reagent for 6 h. Data are normalized to culture  
 224 cell density (OD<sub>600</sub>) and represented as fold change in absorbance at 560 nm over  
 225 respective untreated controls. Error bars represent standard deviation from the mean.  
 226 Data represent at least two independent experiments performed in at least duplicate.  
 227 Statistical significance was calculated with drug-alone group and with the  
 228 bipyridyl/thiourea-only treatment groups with the drug + bipyridyl/thiourea groups by  
 229 two-way ANOVA analysis; (\*\*\*\* $p < 0.0001$ , ns indicates not significant).

230

231

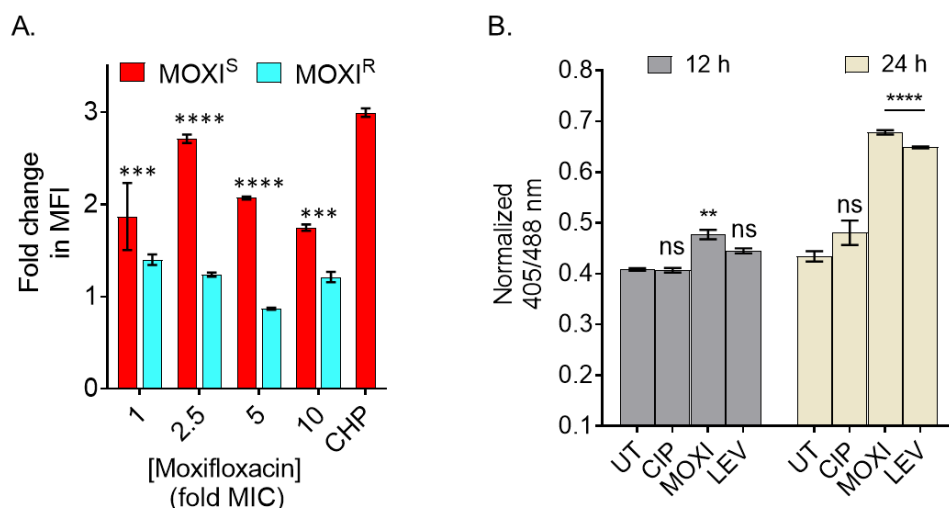

232

233 **Fig. S4. Effect of various fluoroquinolones on ROS production in *M.***

234 ***tuberculosis.* (A)** Strain *M. tuberculosis-roGFP2* (moxifloxacin sensitive (MOXI<sup>S</sup>); 1X

235 MIC = 0.5  $\mu$ M) and a moxifloxacin-resistant *M. tuberculosis* strain (MOXI<sup>R</sup>); 1X MIC =

236 1.25  $\mu$ M) were exposed to the indicated concentrations of moxifloxacin (1X MIC = 0.5

237  $\mu$ M) for 48 h, and ROS were quantified by flow-cytometry using CellROX Deep Red

238 dye. An oxidant, cumene hydroperoxide (CHP; 10 mM), served as a positive control.

239 Data represent fold change in median fluorescence intensity (MFI) of the dye

240 compared to an untreated control. **(B)** Exponentially growing log-phase *M.*

241 *tuberculosis-roGFP2* cultures were treated with 2.5X MBC of moxifloxacin (MOXI),

242 ciprofloxacin (CIP), or levofloxacin (LEV), and the ratiometric response of the

243 biosensor was determined at 12 h and 24 h of treatment. Ciprofloxacin, which has a

244 higher MBC, does not induce oxidative stress. Error bars represent standard deviation

245 from the mean. Data shown are representative of two independent experiments

246 performed in duplicate. Statistical considerations were as in Fig. S2.

247 These data address the robustness of the relationship between ROS and survival of

248 *M. tuberculosis* following fluoroquinolone treatment. For various fluoroquinolones,

249 killing is known to be greater for those with a lower MIC; thus, the ROS data fit with

250 killing. For the resistant mutant, prevention of primary-lesion formation blocks the

251 downstream death process; a lower ROS signal is the expected result.

252

253

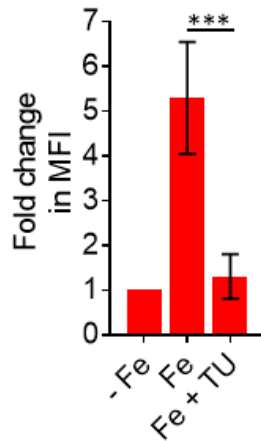

254

255 **Fig. S5. Increased free iron (Fe) concentration leads to ROS generation in *M.***  
256 ***tuberculosis*.** Fe-depleted bacterial cultures (-Fe) were supplemented with 80  $\mu$ M  
257 ferric chloride ( $\text{FeCl}_3$ ) in the presence or absence of an ROS scavenger, thiourea (TU;  
258 10 mM), for 4 days, and ROS were quantified by flow-cytometry using CellROX Deep  
259 Red dye. Data represent fold change in median fluorescence intensity (MFI) of the dye  
260 over untreated control (-Fe). Error bars represent standard deviation of the mean. Data  
261 shown are representative of two independent experiments performed in duplicate.  
262 Statistical considerations were as in Fig. S2.

263

264

265

266

267

268

269

270

271

272

273

274

275

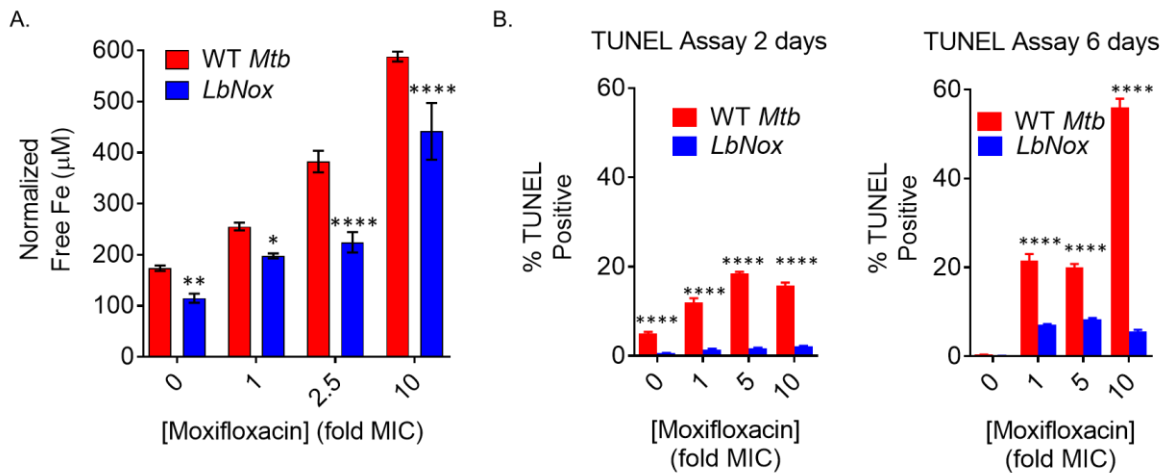

276

277 **Fig. S6. Moxifloxacin treatment increases free Fe pools and DNA breaks in *M.***  
 278 ***tuberculosis* that are decreased by NADH dissipation. (A)** Detection of free Fe  
 279 levels. Exponentially growing *M. tuberculosis* cultures were treated with the indicated  
 280 concentrations of moxifloxacin (1X MIC=0.5 µM) for 2 days, and free Fe levels were  
 281 determined by a ferrozine-based colorimetric assay. **(B)** TUNEL Assay for measuring  
 282 DNA double-stranded breaks using flow cytometry. Results were compared with drug-  
 283 treated, wild-type *M. tuberculosis*. Error bars represent standard deviation from the  
 284 mean. Data shown are representative of two independent experiments performed in  
 285 triplicate. Statistical considerations were as in Fig. S2.

286

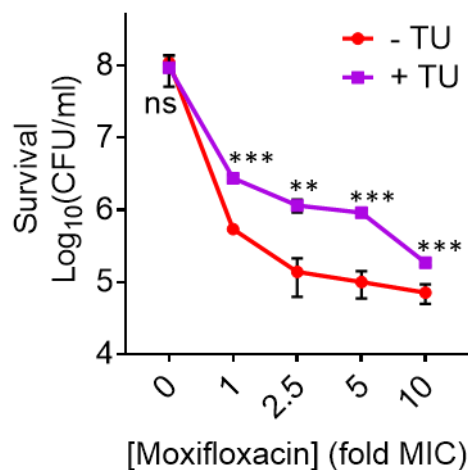

287

288 **Fig. S7: Reduction in moxifloxacin lethal activity by the ROS scavenger thiourea.**  
 289 Exponentially growing *M. tuberculosis* cells were either left untreated or treated with  
 290 10 mM TU for 1 h prior to addition of the indicated concentrations of moxifloxacin (1X  
 291 MIC=0.5 µM) for 2 days followed by determination of CFU on drug-free 7H11 plates.  
 292 Error bars represent standard deviation from the mean. Data shown are representative  
 293 of two independent experiments performed in duplicate. Statistical considerations  
 294 were as in Fig. S2.

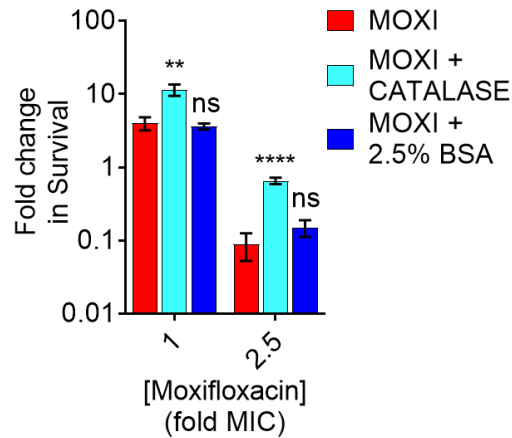

295 **Fig. S8. Addition of extra bovine serum albumin to agar plates does not protect**  
 296 ***M. tuberculosis* from moxifloxacin-mediated lethality.** *M. tuberculosis* cultures  
 297 were treated with 1X and 2.5X MIC of moxifloxacin (MOXI; 1X MIC= 0.5  $\mu$ M) for 48 h,  
 298 washed, and then plated on 7H11 agar without catalase, with catalase (17.5 U/mL of  
 299 7H11 agar), or with 2.5% bovine serum albumin (BSA; 5-fold higher than normal BSA  
 300 content in 7H11 agar). Fold change in survival was calculated relative to untreated  
 301 control. Error bars represent standard deviation from the mean. Statistical significance  
 302 was calculated between drug-alone group with drug + catalase or drug + 2.5% BSA  
 303 groups. Statistical considerations were as in Fig. S2.

304  
 305  
 306  
 307  
 308

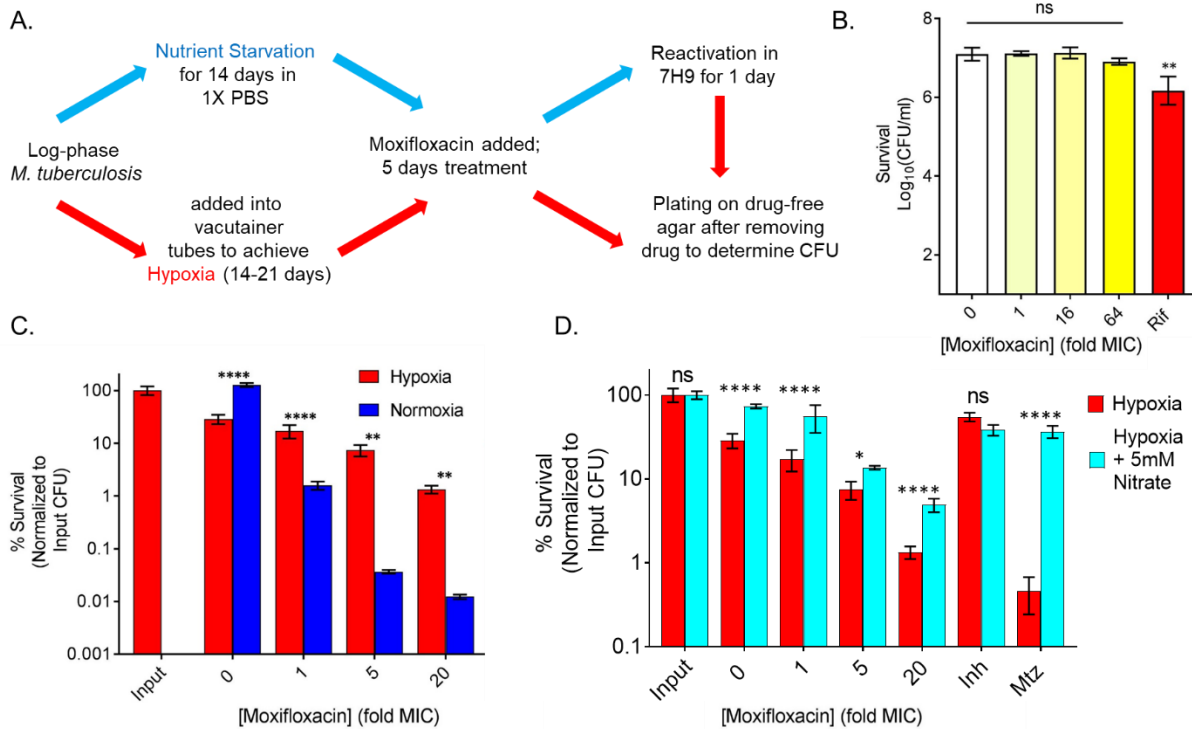

309

310

311 **Fig. S9. Moxifloxacin lethality during nutrient starvation and hypoxia.** (A)  
 312 Experimental plan for examining effects of moxifloxacin under nutrient starvation (blue  
 313 arrows) and hypoxia (red arrows). (B) Effect of nutrient starvation. *M. tuberculosis*  
 314 cultures were starved for nutrients for 14 days and then treated with moxifloxacin (1X  
 315 MIC= 0.5  $\mu\text{M}$ ) for 5 days before determination of survival. Rifampicin (Rif; 25  $\mu\text{M}$ )  
 316 served as a drug control. (C) Effect of hypoxia. Survival of *M. tuberculosis* under  
 317 hypoxia and aerobic culture conditions (normoxia) when treated with the indicated  
 318 concentrations of moxifloxacin for 5 days, followed by CFU determination. (D)  
 319 Effect of nitrate during hypoxia. Sodium nitrate (5 mM) was added when cultures were placed  
 320 in Vacutainer tubes; treatment conditions were as indicated in Materials and Methods.  
 321 Survival of *M. tuberculosis* was measured as CFU after treatment with the indicated  
 322 concentrations of moxifloxacin for 5 days. Isoniazid (Inh; 10  $\mu\text{M}$ ) and metronidazole  
 323 (Mtz; 10 mM) were controls. Statistical considerations were as in Fig. S2.

324



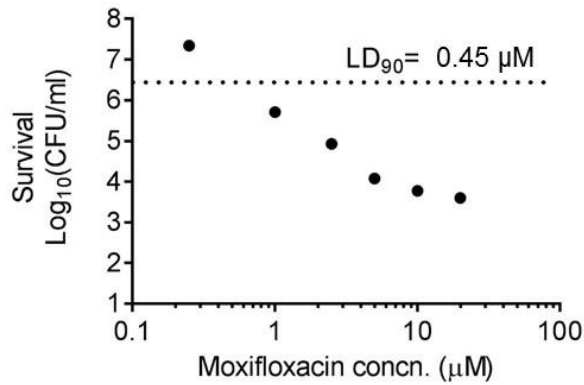

325

326 **Fig. S10. Determination of lethal dose (LD<sub>90</sub>) of moxifloxacin with aerobically**  
 327 **cultured *M. tuberculosis*.** Exponentially growing cultures of *M. tuberculosis* were  
 328 treated for 5 days with the indicated concentrations of moxifloxacin after which aliquots  
 329 were diluted and plated on drug-free agar and incubated for 3-4 weeks. The  
 330 experiment was performed twice in triplicate. Dotted line indicates 90% reduction in  
 331 CFU compared to input control (CFU at the time of drug addition); the corresponding  
 332 concentration of moxifloxacin was taken as LD<sub>90</sub>.

333

334

335

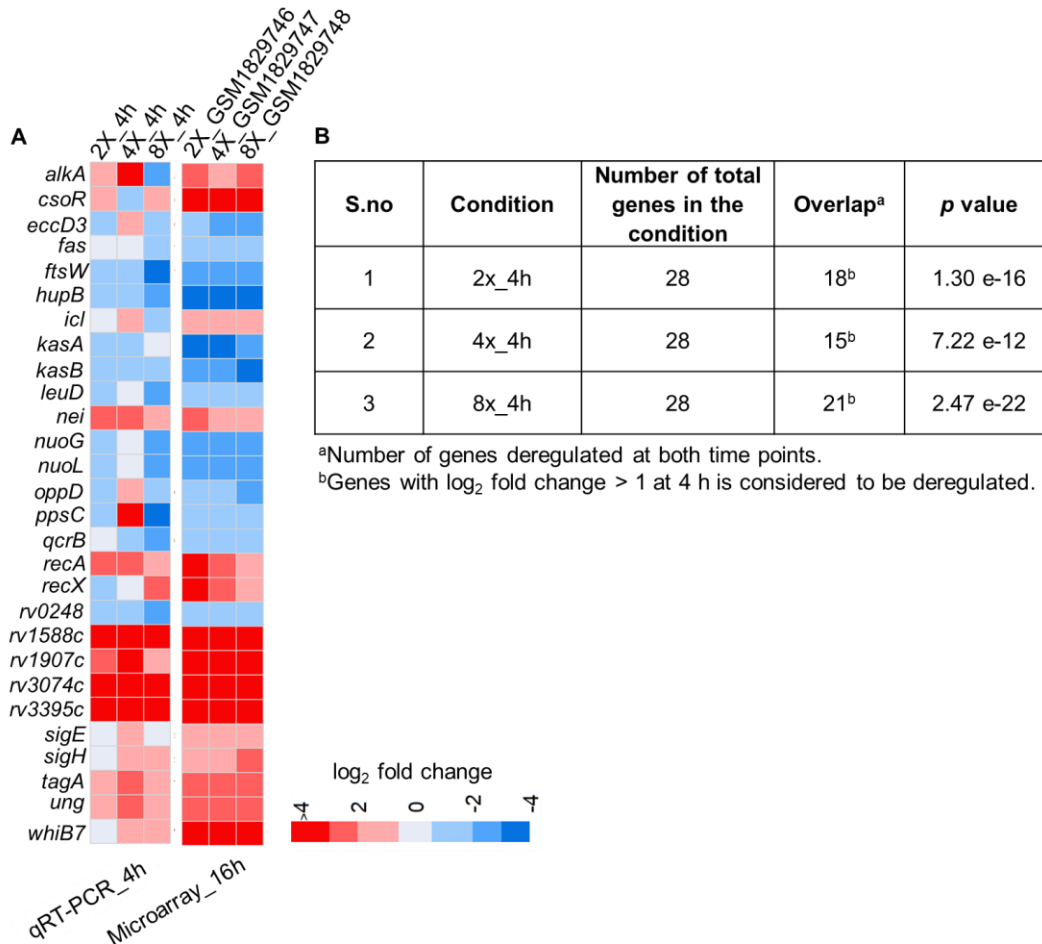

336

337 **Fig. S11. Heat map showing qRT-PCR validation of 28 randomly selected genes**  
 338 **differentially regulated in the microarray data. A.** (qRT-PCR\_4 h) Heat map  
 339 depicting expression of genes (log<sub>2</sub> fold change) for 4-h treatment with 2X, 4X, or 8X  
 340 moxifloxacin (1X MIC = 0.4 μM) compared to untreated control using qRT-PCR  
 341 analysis. (Microarray 16 h) indicates heat map depicting expression of these 28 genes  
 342 (log<sub>2</sub>-fold change) for 16 h of 2X, 4X, or 8X moxifloxacin-treated *M.*  
 343 *tuberculosis* compared to untreated control by microarray data. Color code for the fold  
 344 change is shown (red: upregulated genes; blue: down-regulated genes). 16S  
 345 expression was used as control. The expression pattern of the 28 differentially  
 346 expressed genes at 4 h is similar to that of the 16-h treatment. **B.** Table showing p  
 347 value for overlap analysis between genes deregulated at 4 h and 16 h after  
 348 moxifloxacin treatment.

349

350

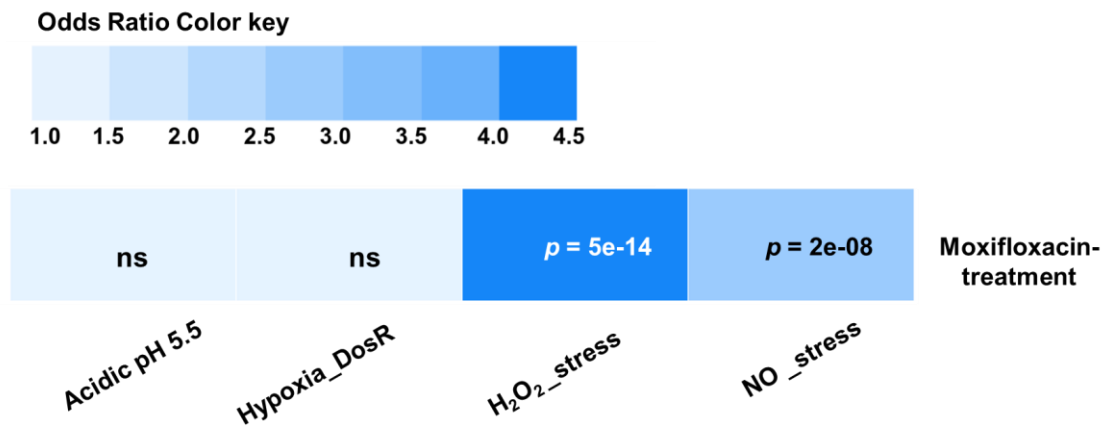

351

352 **Fig. S12. Heat map showing differential gene overlap between moxifloxacin-**  
 353 **exposed *M. tuberculosis* and various stress conditions.** Each column represents  
 354 the overlap between the moxifloxacin-treatment and the individual stress condition.  
 355 The *p*-value of the overlap is indicated for each pair. The color represents the odds  
 356 ratio for the overlap. H<sub>2</sub>O<sub>2</sub> stress showed significant overlap (*p*-value < 0.05) with a  
 357 strong association (odds ratio > 1) with moxifloxacin stress. The acidic pH 5.5 and  
 358 DosR regulated-genes in the hypoxic condition showed no significant overlap. (ns  
 359 indicates not-significant).

360

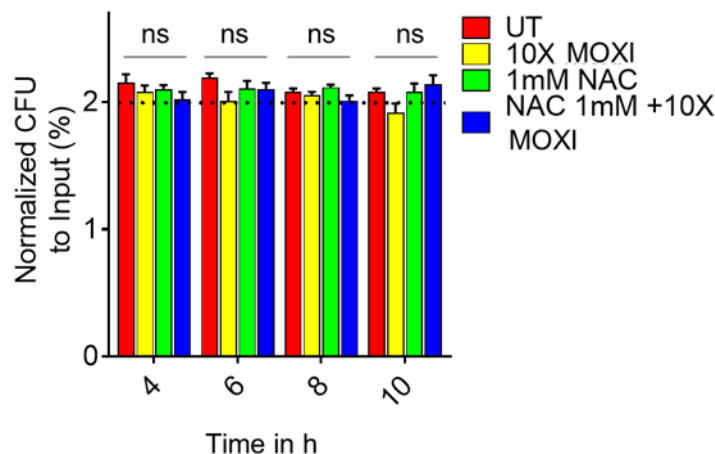

361

362 **Fig. S13. Decelerated respiration in *M. tuberculosis* upon moxifloxacin treatment**  
 363 **is not due to bacterial death.** Bacterial cultures were prepared as for measurement  
 364 of bioenergetics. They were then treated with moxifloxacin (MOXI; 10X MIC= 5 μM)  
 365 alone, NAC alone (1 mM), or the combination for 10 h. Samples were taken at the  
 366 indicated times and plated for determination of CFU, which was normalized to CFU at  
 367 the beginning of the experiment. Error bars represent standard deviation from the  
 368 mean; ns indicates not significant. The data show that during the 10-h incubation,  
 369 moxifloxacin and NAC had no significant effect on *M. tuberculosis* viability. Statistical  
 370 considerations were as in Fig. S2.

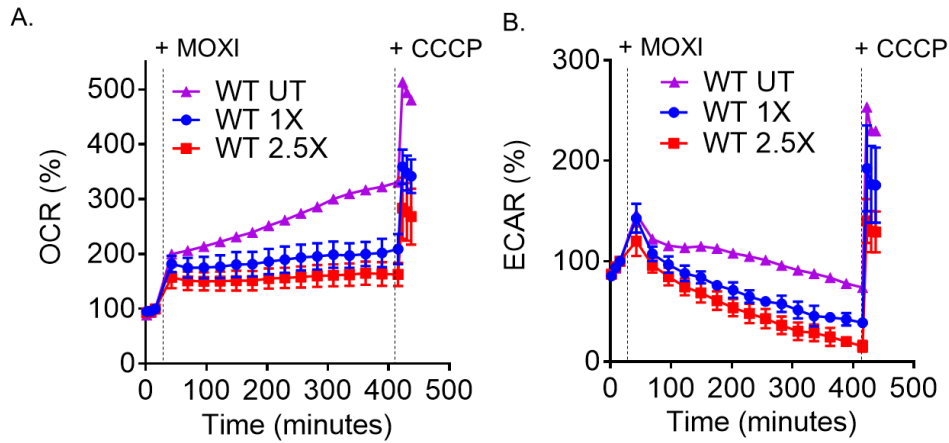

371

372 **Fig. S14. Low moxifloxacin concentrations decelerate respiration rate in *M.***  
 373 ***tuberculosis*.** (A) OCR (pmol/min), an indicator of oxygen consumption rate.  
 374 Exponentially growing *M. tuberculosis* cultures were either left untreated (UT) or  
 375 treated with 1X or 2.5X MIC of moxifloxacin (MOXI; 1X MIC=0.5  $\mu$ M) for the indicated  
 376 times; black dotted lines indicate the time when MOXI or CCCP (10  $\mu$ M) were added.  
 377 Determination was via Seahorse XFp Analyzer (B) ECAR (mpH/min), an indicator of  
 378 H<sup>+</sup> production or extracellular acidification due to glycolytic and TCA flux.  
 379 Determination was as in A. OCR and ECAR data represent percentage of third  
 380 baseline value. Error bars represent standard deviation from the mean. Data shown  
 381 represent two independent experiments performed in triplicate.

382

383

384

385

386

387

388

389

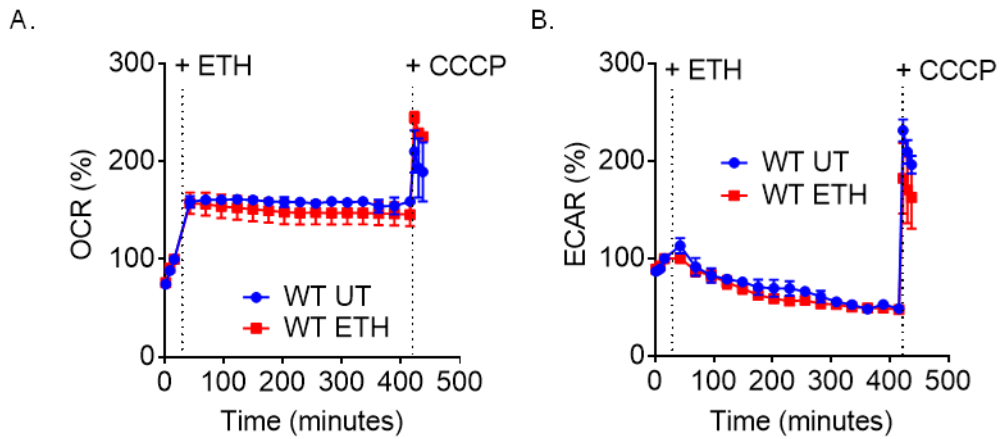

390

391 **Fig. S15. Ethambutol treatment does not affect respiration rate in *M.***  
 392 ***tuberculosis*.** (A) OCR (pmol/min), an indicator of oxygen consumption rate.  
 393 Exponentially growing *M. tuberculosis* cultures were either left untreated (UT) or  
 394 treated with 10X MIC of ethambutol (ETH; 1X MIC= 1  $\mu$ g/ mL); black dotted lines  
 395 indicate the time when ETH or CCCP (10  $\mu$ M) were added to cells. Determination was  
 396 via Seahorse XFp Analyzer (B) ECAR (mpH/min), an indicator of H<sup>+</sup> production or  
 397 extracellular acidification due to glycolytic and TCA flux. Determination was as in A.  
 398 OCR and ECAR data represent percentage of third baseline value. Error bars  
 399 represent standard deviation from the mean. Data shown are representative of two  
 400 independent experiments performed in triplicate.

401

402

403

404

405

406

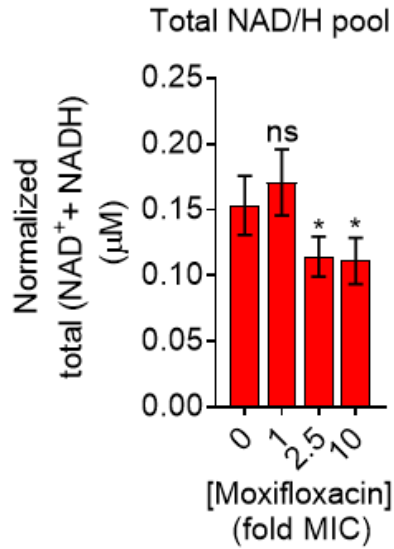

407

408 **Fig. S16. Moxifloxacin treatment decreases total NAD/H (NADH+NAD<sup>+</sup>) in *M.***

409 ***tuberculosis*.** Detection of total NADH + NAD<sup>+</sup> levels. Exponentially growing *M.*

410 *tuberculosis* was treated with the indicated concentrations of moxifloxacin (1X MIC=

411 0.5 μM) for 2 days, and total NADH+ NAD<sup>+</sup> levels were determined by an alcohol

412 dehydrogenase-based redox cycling assay. Error bars represent standard deviation

413 from the mean. Data represent at least two independent experiments performed in at

414 least duplicate. *p* was determined by unpaired two-tailed student's t-test analyzed

415 relative to untreated control. (\*; *p* < 0.05, ns indicates not significant).

416

417

418

419

420

421

422

423

424

425

426

427

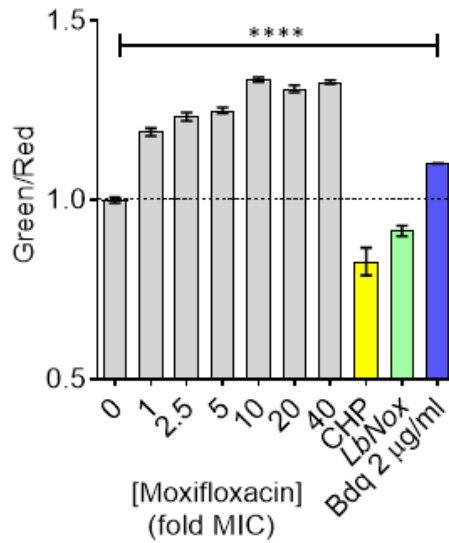

428  
 429 **Fig. S17. Moxifloxacin treatment increases NADH/NAD<sup>+</sup> ratios in *M. tuberculosis***  
 430 **detected by Peredox.** *M. tuberculosis* H37Rv, expressing the Peredox biosensor,  
 431 was treated with indicated concentrations of moxifloxacin (1X MIC= 0.5 µM) for 48 h;  
 432 green (Ex/Em. = 405/510 nm) and red fluorescence (Ex/Em. = 560/615 nm) were  
 433 measured by FACS. The green/red ratio corresponds to NADH/NAD<sup>+</sup> levels in the  
 434 bacterial culture. NADH-responsive Rex protein is fused to T-sapphire which  
 435 fluoresces based on dynamic NADH/NAD<sup>+</sup> levels; mCherry fluorescence is a  
 436 normalizing control. Untreated *LbNox* strain, cumene hydroperoxide (CHP; 1 mM), and  
 437 bedaquiline (Bdq; 2 µg/ml)-treated cells expressing Peredox are controls. Error bars  
 438 represent standard deviation from the mean. Data are representative of two  
 439 independent experiments performed in duplicate. Statistical significance was  
 440 determined by one-way ANOVA followed by Dunnett's test; \*\*\*\**p* < 0.001.

441  
 442  
 443  
 444

445  
446  
447  
448  
449  
450  
451  
452  
453

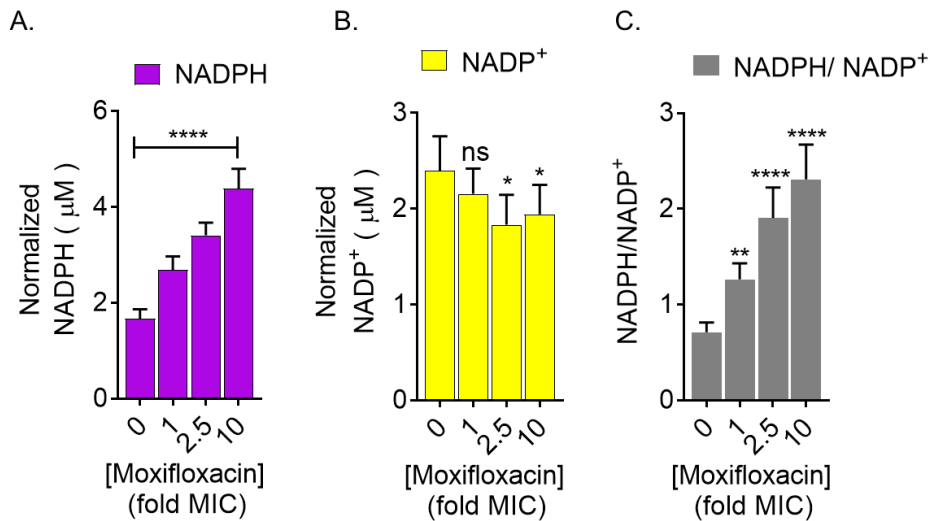

454 **Fig. S18. NADP<sup>+</sup> and NADPH levels in moxifloxacin-treated *M. tuberculosis*.**  
455 Detection of (A) NADPH, (B) NADP<sup>+</sup>, and (C) NADPH/NADP<sup>+</sup> ratio in exponentially  
456 growing *M. tuberculosis* treated with the indicated concentrations of moxifloxacin (1X  
457 MIC= 0.5 μM) for 2 days. NADPH and NADP<sup>+</sup> levels were determined by a glucose-6-  
458 phosphate dehydrogenase-based redox cycling assay. *p* was determined by unpaired  
459 two-tailed student's t-test analyzed relative to an untreated control. (\* *p* <0.05, \*\* *p* ≤  
460 0.01, \*\*\*\* *p* ≤ 0.0001, and ns indicates not significant).

461  
462

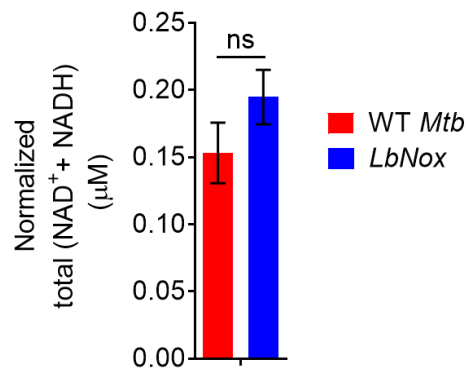

463  
464 **Fig. S19. Total NAD/H (NADH+NAD<sup>+</sup>) was not affected by overexpression of**  
465 ***LbNox* in *M. tuberculosis*.** *M. tuberculosis* cultures were grown to log-phase (OD<sub>600</sub>  
466 = 0.6-0.8), and total NADH+NAD<sup>+</sup> levels were determined by an alcohol  
467 dehydrogenase-based redox cycling assay. Error bars represent standard deviation  
468 of the mean. Data represent two independent experiments performed in at least  
469 duplicate. *p* was determined by unpaired two-tailed student's t-test analyzed  
470 relative to an untreated control (*p* > 0.05; ns indicates not significant).

471



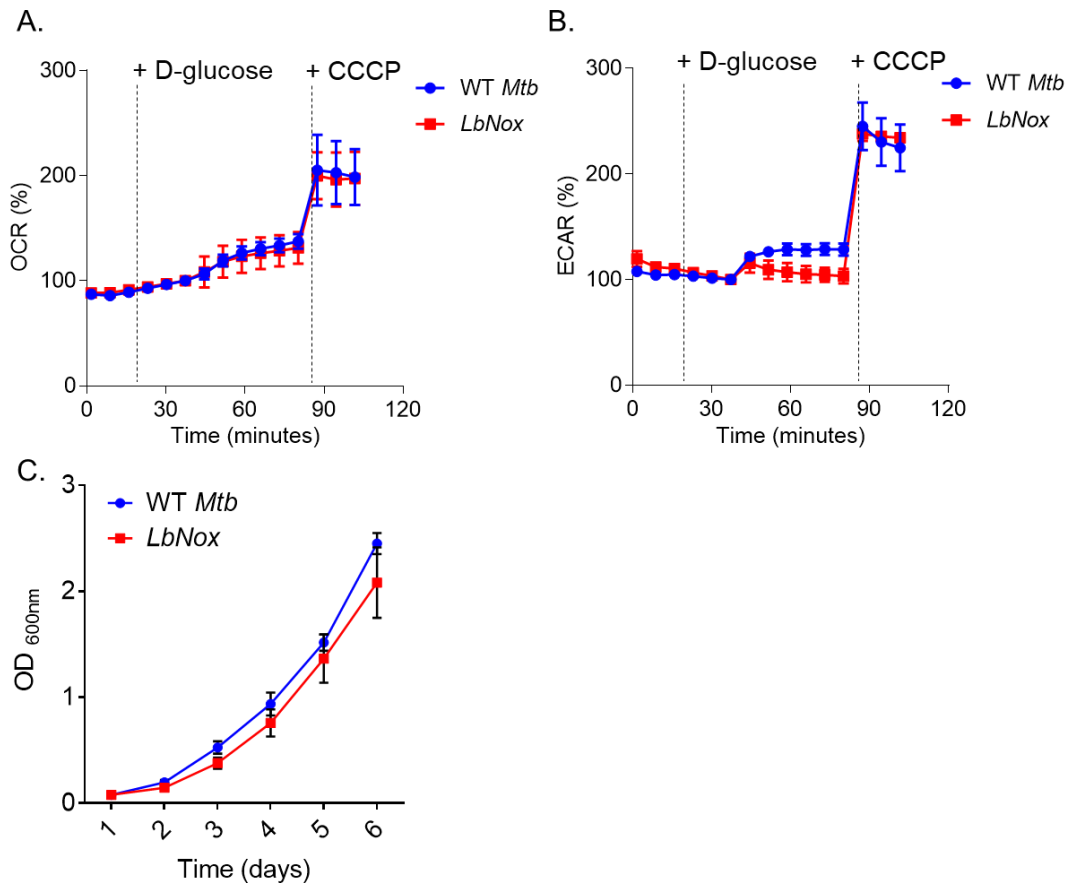

472

473 **Fig. S20. Constitutive expression of *LbNox* does not impair metabolism and**  
 474 **growth rate of *M. tuberculosis*.** Exponentially growing wild-type *M. tuberculosis* (WT  
 475 *Mtb*) and an *LbNox*-overexpressing strain were starved overnight for glucose.  
 476 Changes in **(A)** Oxygen Consumption Rate (OCR) and **(B)** Extracellular Acidification  
 477 Rate (ECAR) were quantified after addition of 2 mg/mL D-glucose and subsequently  
 478 by 10  $\mu$ M of the uncoupler CCCP using a Seahorse XF flux analyzer. Black dotted  
 479 lines indicate the time when D-glucose or CCCP were added to cultures. OCR and  
 480 ECAR data represent percentage of third baseline value. Data shown are  
 481 representative of two independent experiments performed in triplicate. Error bars  
 482 represent standard deviation from the mean. **(C)** Culture turbidity (OD<sub>600</sub>) for wild-type  
 483 (WT *Mtb*) *M. tuberculosis* and the *LbNox* strain in 7H9+ADS broth was measured.  
 484 Data shown are the result of two independent experiments. Error bars represent  
 485 standard deviation from the mean.

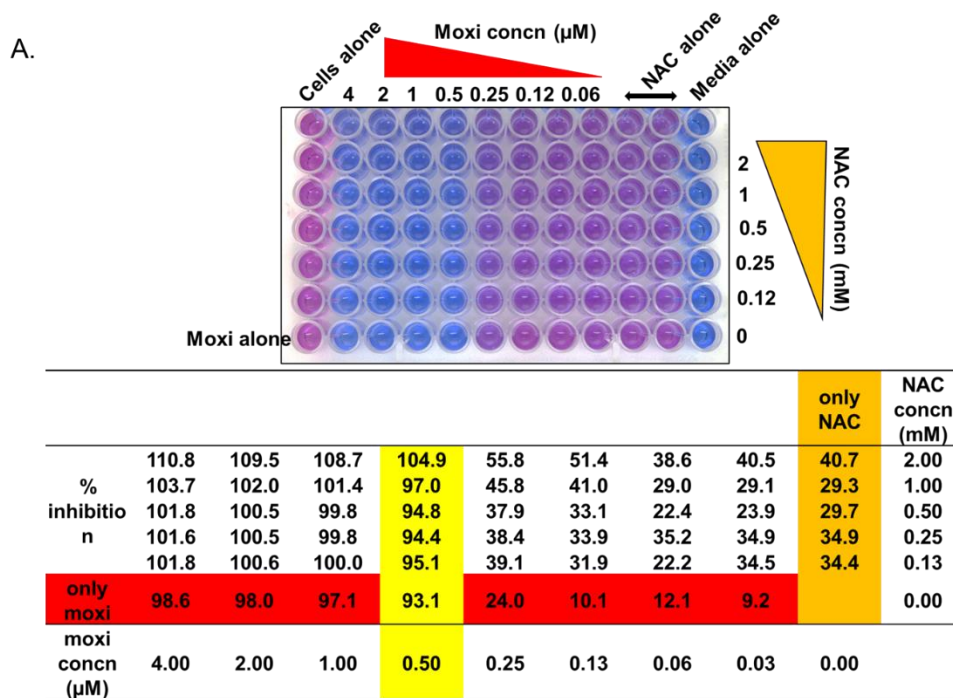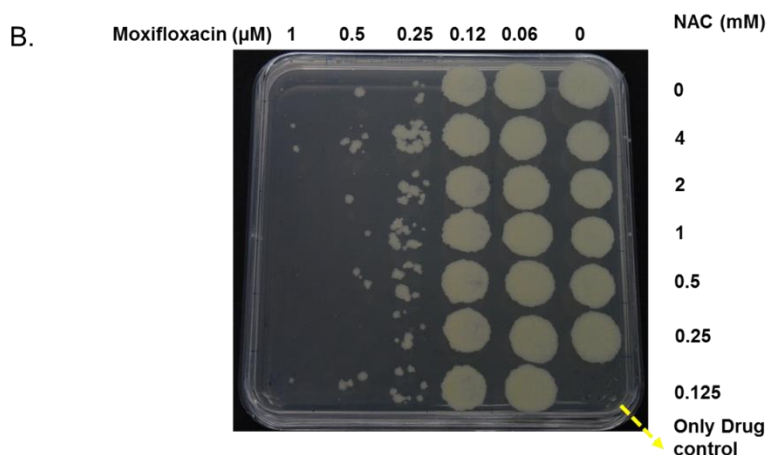

486

487 **Fig. S21. NAC has no effect on moxifloxacin MIC with *M. tuberculosis*.** (A) REMA  
 488 assay. Color change from non-fluorescent blue resazurin to fluorescent pink resorufin  
 489 by cellular metabolic activity indicates reduction of resazurin in the assay. % Inhibition  
 490 of color change with respect to cells-only control is shown in the table. % Inhibition by  
 491 moxifloxacin alone decreases with decreasing concentration, as shown in red. %  
 492 Inhibition by NAC alone is shown in golden color. 90% inhibition is considered as MIC  
 493 (= 0.5 µM for moxifloxacin alone; yellow highlight). No change in MIC is observed in  
 494 the presence of NAC. (B) 7H11 Agar plate assay for MIC. 20 µL cells from MIC plate  
 495 were regrown on 7H11 agar. NAC also had no effect on moxifloxacin MIC when  
 496 measured by growth on drug-containing agar plates. Data shown are representative  
 497 of two independent experiments.

498

499

500

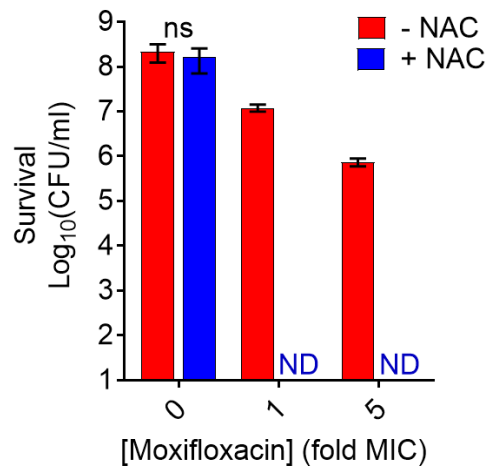

501

502 **Fig. S22. Addition of NAC after removal of moxifloxacin increases killing of *M.***  
 503 ***tuberculosis*.** In this assay for post-stressor death, *M. tuberculosis* cultures were  
 504 treated with moxifloxacin (1X MIC= 0.5 μM) for 48 h, the drug was removed by  
 505 washing, and cells were plated on drug-free 7H11 agar with or without 1 mM NAC.  
 506 After incubation for 2 weeks, CFU were determined visually. ND indicates no colony  
 507 was detected. Error bars represent standard deviation from the mean. Statistical  
 508 significance was calculated between drug-alone group with drug + NAC group. Data  
 509 shown are the result of two independent experiments performed in duplicate.  
 510 Statistical considerations were as in Fig. S2.

511

512 This experiment is the complement to the reduction in killing seen when catalase is  
 513 present on agar to lower ROS in cells. The result strongly supports the idea that ROS,  
 514 once levels pass a threshold, become self-sustaining: the presence of the initial  
 515 stressor is no longer required. This is the result expected from a stress-mediated death  
 516 pathway.

517

518

519

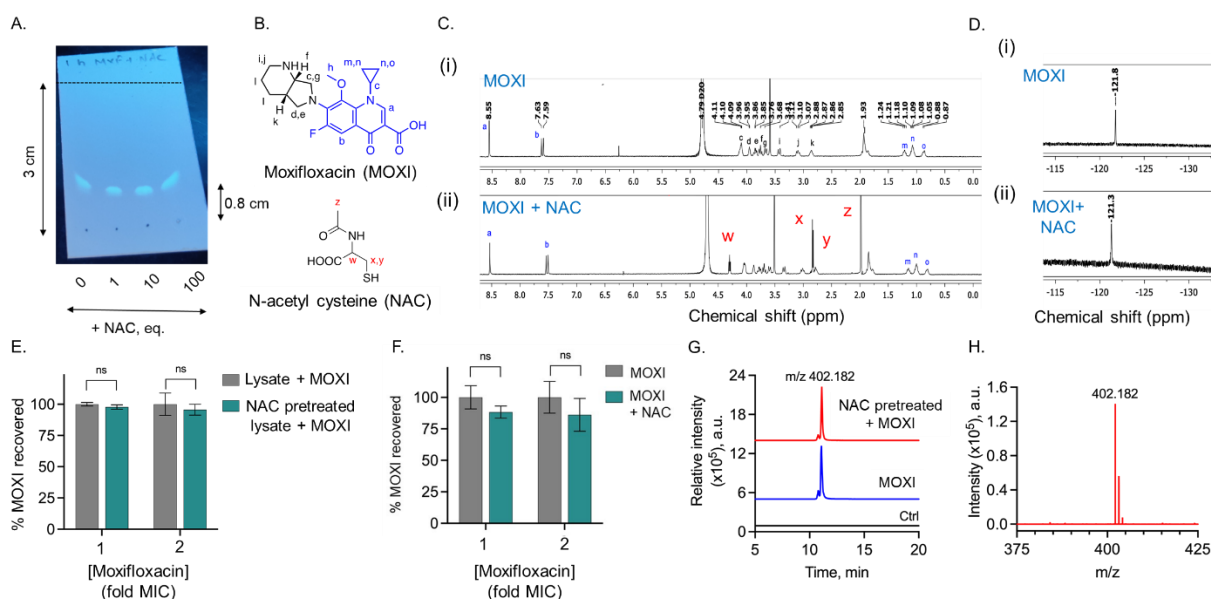

520

521 **Fig. S23. Several tests argue against formation of adducts between NAC and**  
 522 **moxifloxacin (MOXI).**

523 **(A)** Thin layer chromatography (TLC) analysis of the reaction mixture containing MOXI  
 524 ( $R_f = 0.26$ ) alone or with NAC in pH 7.4 buffer at 37 °C. The solvent system used was  
 525 1:9 methanol/ chloroform and the TLC plate was visualized in a UV chamber at 254  
 526 nm. Reaction time was 60 min. The lanes indicate (1) authentic MOXI ( $R_f = 0.26$ ), (2)  
 527 MOXI + NAC (1:1), (3) MOXI + NAC (1:10), and (4) MOXI + NAC (1:100). Although  
 528 the result shows curvature, the position of the moxifloxacin signal is unchanged, and  
 529 no new signal representing a putative adduct was seen.

530 **(B)** Structures of MOXI and NAC.

531 **(C, D)** NMR analysis. Stacked spectra of (C)  $^1\text{H}$ -NMR and (D)  $^{19}\text{F}$ -NMR acquired after  
 532 1 h incubation of (i) MOXI alone and (ii) MOXI with NAC (1:1) in deuterated phosphate  
 533 buffer (pH = 7.4, 10 mM) at 37 °C. No new signal corresponding to putative MOXI-  
 534 NAC adduct was observed. The singlet and doublet peaks corresponding to  
 535 characteristic 'a' and 'b' protons (highlighted in blue) of MOXI at  $\delta_{\text{H}}$  8.55 and 7.61 ppm  
 536 in the  $^1\text{H}$ -NMR spectrum remain largely unchanged in the presence of NAC. Similarly,  
 537 no significant change in the  $^{19}\text{F}$ -NMR spectrum of MOXI was created by the presence  
 538 of NAC.

539 **(E)** Monitoring the amount of MOXI recovered by a fluorescence-based assay. *M.*  
 540 *smegmatis* lysates (1 mg/mL; protein concentration in lysate as determined by  
 541 Bradford assay) were treated with MOXI alone or pre-treated with NAC (1 mM)  
 542 followed by MOXI. Fluorescence measurements were carried out after 24 h of  
 543 incubation at the indicated MIC concentrations (1X and 2X; 0.25  $\mu\text{M}$  and 0.5  $\mu\text{M}$ ) for  
 544 MOXI. Error bars represent standard deviation from the mean. Data shown are  
 545 representative of two independent experiments, each performed in triplicate. (ns  
 546 indicates not significant).

547 **(F)** Insignificant effect of NAC on recovery of moxifloxacin from *M. smegmatis*. Wild-  
548 type *M. smegmatis* cultures were pretreated with 1 mM NAC for 1 h and then  
549 moxifloxacin was added to either 1X or 2X MIC for a 48-h incubation. Detection of  
550 moxifloxacin was by fluorescence. Reduction of moxifloxacin recovery by NAC was  
551 insignificant. Error bars represent standard error of the mean. Data shown are  
552 representative of two independent experiments performed in triplicate. (ns indicates  
553 not significant).

554 **(G)** LC-MS based quantitative determination of MOXI in WT *M. smegmatis*. Extracted  
555 ion chromatograms (EIC) show no NAC-moxifloxacin adduct when obtained from  
556 treated *M. smegmatis*. A signal at  $m/z$  402.1824 corresponded to MOXI (expected,  
557  $[M+H]^+ = 402.1824$ ; observed  $[M+H]^+ = 402.1813$ ) recovered in lysates obtained from  
558 lysis of NAC (1 mM)-untreated and NAC-pretreated wild-type *M. smegmatis*  
559 challenged with 2x MIC (0.5  $\mu$ M) of MOXI for 48 h. Ctrl refers to bacteria alone.

560 **(H)** LC-MS traces (MRM-HR) for MOXI ( $m/z = 402.182$ ) recovered in NAC-treated wild-  
561 type *M. smegmatis* incubated with MOXI (2x MIC). Nearly quantitative recovery of  
562 MOXI (>85%) was observed under these conditions.

563

564

565

566

567

568

569

570

571

572

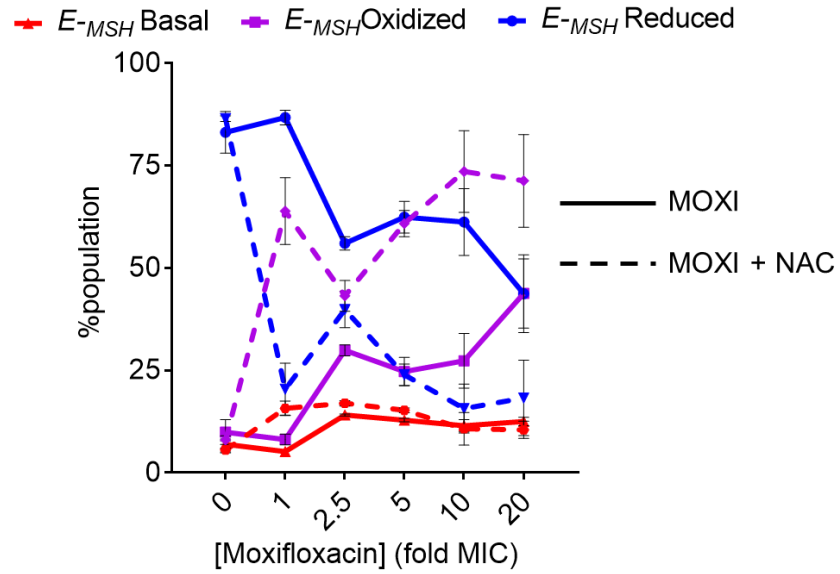

573

574 **Fig. S24. Moxifloxacin-induced oxidative shift in  $E_{MSH}$  of *M. tuberculosis***  
 575 **NHN1664 during infection of THP-1 cells.** THP-1 macrophage-like cells, infected at  
 576 an MOI of 1:10 with the MDR strain NHN1664 expressing Mrx1-roGFP2, were treated  
 577 with the indicated concentrations of moxifloxacin (1X MIC= 0.5  $\mu$ M) in the presence or  
 578 absence of NAC (1 mM) immediately after infection. They were then incubated for 24  
 579 h. Approximately 10,000 infected macrophages were analyzed by flow cytometry to  
 580 quantify changes in *M. tuberculosis* subpopulations displaying redox heterogeneity.

581

582 The data show that NAC induces an oxidative shift in an MDR strain that lowered the  
 583 drug-tolerant  $E_{MSH}$ -reduced subpopulation (blue line in line graph), similar to that seen  
 584 with infection with the drug-sensitive laboratory strain *M. tuberculosis* H37Rv.

585

586

587

588

589

590

591

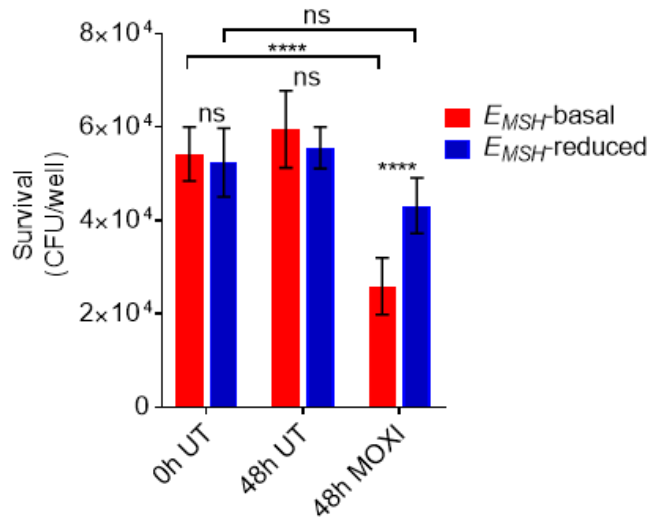

592

593 **Fig. S25. Intramacrophage  $E_{MSH}$ -reduced *M. tuberculosis* shows reduced killing**  
 594 **by moxifloxacin.** Infected macrophages were sorted by flow cytometry into those  
 595 harboring *M. tuberculosis* at an  $E_{MSH}$ -basal and those with *M. tuberculosis* at an  $E_{MSH}$ -  
 596 reduced redox state. The two groups were exposed to 3X MIC of moxifloxacin (MOXI;  
 597 1X MIC= 0.5  $\mu$ M) or left untreated (UT) for 48 h. Macrophages were then lysed, and  
 598 the bacillary load was determined by CFU enumeration by incubation of bacteria on  
 599 agar plates.  $E_{MSH}$  was determined as described in Methods. Error bars represent  
 600 standard deviation from the mean. Data shown are representative of two independent  
 601 experiments performed in at least triplicate.  $p$  was determined by unpaired two-tailed  
 602 student's t-test (\*\*\*\* $p < 0.0001$ , ns indicates not significant).

603 These data show that when the redox state of intracellular *M. tuberculosis* is reduced  
 604 ( $E_{MSH}$ -reduced), moxifloxacin lethality is significantly decreased, while  $E_{MSH}$ -basal  
 605 bacteria remain sensitive to the drug.

606

607 **Supplementary References**

608

- 609 1. Gengenbacher M, Rao SP, Pethe K, Dick T. 2010. Nutrient-starved, non-  
610 replicating *Mycobacterium tuberculosis* requires respiration, ATP synthase and  
611 isocitrate lyase for maintenance of ATP homeostasis and viability. *Microbiology*  
612 (Reading) 156:81-87.
- 613 2. Rohde KH, Abramovitch RB, Russell DG. 2007. *Mycobacterium tuberculosis*  
614 invasion of macrophages: linking bacterial gene expression to environmental  
615 cues. *Cell Host Microbe* 2:352-64.
- 616 3. Rustad TR, Harrell MI, Liao R, Sherman DR. 2008. The enduring hypoxic  
617 response of *Mycobacterium tuberculosis*. *PLoS One* 3:e1502.
- 618 4. Voskuil M, Bartek I, Visconti K, Schoolnik G. 2011. The response of  
619 *Mycobacterium tuberculosis* to reactive oxygen and nitrogen species. *Front*  
620 *Microbiol* 2:1-12.
- 621 5. Bhaskar A, Chawla M, Mehta M, Parikh P, Chandra P, Bhave D, Kumar D,  
622 Carroll KS, Singh A. 2014. Reengineering redox sensitive GFP to measure  
623 mycothiol redox potential of *Mycobacterium tuberculosis* during infection. *PLoS*  
624 *Pathog* 10:e1003902.
- 625 6. Mishra R, Kohli S, Malhotra N, Bandyopadhyay P, Mehta M, Munshi M, Adiga  
626 V, Ahuja VK, Shandil RK, Rajmani RS, Seshasayee ASN, Singh A. 2019.  
627 Targeting redox heterogeneity to counteract drug tolerance in replicating  
628 *Mycobacterium tuberculosis*. *Sci Transl Med* 11:eaaw6635.
- 629 7. Mishra S, Shukla P, Bhaskar A, Anand K, Baloni P, Jha RK, Mohan A, Rajmani  
630 RS, Nagaraja V, Chandra N, Singh A. 2017. Efficacy of  $\beta$ -lactam/ $\beta$ -lactamase  
631 inhibitor combination is linked to WhiB4-mediated changes in redox physiology  
632 of *Mycobacterium tuberculosis*. *eLife* 6.



633 8. Nambi S, Long JE, Mishra BB, Baker R, Murphy KC, Olive AJ, Nguyen HP,  
634 Shaffer SA, Sassetti CM. 2015. The oxidative stress network of *Mycobacterium*  
635 *tuberculosis* reveals coordination between radical detoxification systems. Cell  
636 Host Microbe 17:829-37.

637
